# Supplementary material for: Impact of peri-intraventricular haemorrhage and periventricular leukomalacia in the neurodevelopment of preterms: A systematic review and meta-analysis
Source: PLOS journal article supplement (doi:10.1371/journal.pone.0223427), 2019-10-10
Supplement: S2 (10.1371/journal.pone.0223427.s002) [file journal.pone.0223427.s002]

**Modified Newcastle-Ottawa quality assessment scale  
cohort studies**

| No.                  | Criterion                                                                        | Decision rule                                                                                                                                                                                                                                                                                                                               | Score (*=1, no*=0) |
|----------------------|----------------------------------------------------------------------------------|---------------------------------------------------------------------------------------------------------------------------------------------------------------------------------------------------------------------------------------------------------------------------------------------------------------------------------------------|--------------------|
| <b>SELECTION</b>     |                                                                                  |                                                                                                                                                                                                                                                                                                                                             |                    |
| 1                    | Representativeness of the exposed cohort                                         | a) Consecutive eligible participants were selected, participants were randomly selected, or all participants were invited to participate from the source population*<br>b) Not satisfying requirements in part (a), or not stated.                                                                                                          |                    |
| 2                    | Selection of the non-exposed cohort                                              | a) Selected from the same source population*<br>b) Selected from a different source population<br>c) No description                                                                                                                                                                                                                         |                    |
| 3                    | Ascertainment of exposure                                                        | a) Structured injury data (e.g. record completed by medical staff)*<br>b) Structured interview*<br>c) Written self-report<br>d) No description                                                                                                                                                                                              |                    |
| 4                    | Demonstration that outcome of interest was not present at the start of the study | a) Yes*<br>b) No or not explicitly stated                                                                                                                                                                                                                                                                                                   |                    |
| <b>COMPARABILITY</b> |                                                                                  |                                                                                                                                                                                                                                                                                                                                             |                    |
| 1                    | Comparability of cohorts on the basis of the design or analysis                  | a) Study controls for age*<br>b) Study controls for birth weight*<br><i>Note:</i> Exposed and non-exposed individuals must be matched in the design and/or confounders must be adjusted for in the analysis. Alone statements of no differences between groups or that differences were not statistically significant are not sufficient.   |                    |
| <b>OUTCOME</b>       |                                                                                  |                                                                                                                                                                                                                                                                                                                                             |                    |
| 1                    | Assessment of outcome                                                            | a) Independent or blind assessment stated, or confirmation of the outcome by reference to secure records (e.g. imaging, structured injury data, etc.)*<br>b) record linkage (e.g. identified through ICD codes on database records)*<br>c) Self-report with no reference to original structured injury data or imaging<br>d) No description |                    |
| 2                    | Was follow-up long enough for outcomes to occur?                                 | a) Yes ( $\geq 12$ months)*<br>b) No ( $< 3$ months)                                                                                                                                                                                                                                                                                        |                    |
| 3                    | Adequacy of follow up of cohorts                                                 | a) Complete follow up – all participants accounted for*<br>b) Subjects lost to follow up unlikely to introduce bias ( $< 20\%$ lost to follow up, or description provided of those lost*)<br>c) Follow up rate $< 85\%$ and no description of those lost provided<br>d) No statement                                                        |                    |
| <b>SCORE</b>         |                                                                                  |                                                                                                                                                                                                                                                                                                                                             |                    |
